# Supplementary material for: Bind-n-Seq: high-throughput analysis of in vitro protein–DNA interactions using massively parallel sequencing
Source: PubMed Central journal article supplement — Nucleic Acids Res. 2009 Oct 20;37(22):e151. doi: 10.1093/nar/gkp802 (PMC2794170; doi:10.1093/nar/gkp802), 2009-10-20
Supplement: gkp802_1.pdf [file gkp802_1.pdf]

## **Supplementary Data for:**

# **Bind-n-Seq: high-throughput analysis of *in vitro* protein-DNA interactions using massively parallel sequencing**

Artem Zykovich, Ian Korf\*, and David J Segal\*

Genome Center, University of California, Davis, CA, 95616.

**\*Correspondence should be addressed to:**

D.J.S. (djsegal@ucdavis.edu) and I.K. (ifkorf@ucdavis.edu)

**Supplementary Table S1A.** Bar codes for Bind-n-Seq run 1.

| <b>Bar Code</b> | <b>Protein</b> | <b>Protein (nM)</b> | <b>Salt (mM)</b> | <b>Extra</b> |
|-----------------|----------------|---------------------|------------------|--------------|
| AAA             | No-protein     | 0                   | 100              |              |
| AAC             | Aart           | 50                  | 1                |              |
| AAG             | Aart           | 50                  | 10               |              |
| AAT             | Aart           | 50                  | 50               |              |
| ACA             | Aart           | 50                  | 100              |              |
| ACC             | Aart           | 50                  | 500              |              |
| ACG             | Aart           | 5                   | 100              |              |
| ACT             | Aart           | 0.5                 | 100              |              |
| AGA             | Aart           | 0.05                | 100              |              |
| AGC             | Aart           | 50                  | 100              | Gel shift    |
| AGG             | No-protein     | 0                   | 100              |              |
| AGT             | Zif268         | 50                  | 1                |              |
| ATA             | Zif268         | 50                  | 10               |              |
| ATC             | Zif268         | 50                  | 50               |              |
| ATG             | Zif268         | 50                  | 100              |              |
| ATT             | Zif268         | 50                  | 500              |              |
| CAA             | Zif268         | 5                   | 100              |              |
| CAC             | Zif268         | 0.5                 | 100              |              |
| CAG             | Zif268         | 0.05                | 100              |              |
| CAT             | Zif268         | 50                  | 100              | Gel shift    |
| CCA             | Oligo only     |                     |                  | Sigma        |
| CCC             | Oligo only     |                     |                  | Sigma        |

**Supplementary Table S1B.** Bar codes for Bind-n-Seq run 2.

| <b>Bar Code</b> | <b>Protein</b> | <b>Protein (nM)</b> | <b>Salt (mM)</b> | <b>Extra</b>   |
|-----------------|----------------|---------------------|------------------|----------------|
| AAA             | No-protein     | 0                   | 100              |                |
| AAC             | Zif268         | 50                  | 1                |                |
| AAG             | Zif268         | 50                  | 10               |                |
| AAT             | Zif268         | 50                  | 50               |                |
| ACA             | Zif268         | 50                  | 100              |                |
| ACC             | Zif268         | 50                  | 500              |                |
| ACG             | Zif268         | 5                   | 100              |                |
| ACT             | Zif268         | 0.5                 | 100              |                |
| AGA             | Zif268         | 0.05                | 100              |                |
| AGC             | Zif268         | 50                  | 100              | Gel shift      |
| AGG             | No-protein     | 0                   | 100              |                |
| AGT             | Aart           | 50                  | 1                |                |
| ATA             | Aart           | 50                  | 10               |                |
| ATC             | Aart           | 50                  | 50               |                |
| ATG             | Aart           | 50                  | 100              |                |
| ATT             | Aart           | 50                  | 500              |                |
| CAA             | Aart           | 5                   | 100              |                |
| CAC             | Aart           | 0.5                 | 100              |                |
| CAG             | Aart           | 0.05                | 100              |                |
| CAT             | Aart           | 50                  | 100              | Gel shift      |
| CCA             | Oligo only     |                     |                  | Sigma          |
| CCC             | Oligo only     |                     |                  | Sigma          |
| CCG             | Zif268         | 5                   | 100              | Long wash      |
| CCT             | Zif268         | 5                   | 100              | + round        |
| CGA             | Zif268         | 5                   | 200              |                |
| CGC             | Zif268         | 5                   | 100              | Ficoll         |
| CGT             | Aart           | 5                   | 100              | Long wash      |
| CTA             | Aart           | 5                   | 100              | + round        |
| CTC             | Aart           | 5                   | 200              |                |
| CTG             | Aart           | 5                   | 100              | Ficoll         |
| TGG             | Oligo only     |                     |                  | Sigma hand mix |
| TGT             | Oligo only     |                     |                  | Sigma hand mix |
| TTA             | Oligo only     |                     |                  | IDT            |
| TTC             | Oligo only     |                     |                  | IDT            |
| TTG             | Oligo only     |                     |                  | Bioneer        |
| TTT             | Oligo only     |                     |                  | Bioneer        |

**Supplementary Table S2.** Relative affinity by QuMFRA from Liu et al, 2005

| Sequence   | Relative Ka |
|------------|-------------|
| GCGTGGGCGT | 39.93       |
| GCGTGGGCGG | 23.32       |
| GCGTGGGAGG | 10.36       |
| GCGTGGGCAT | 7.22        |
| GCGTGGGTTT | 5.68        |
| GCGTGGGGTG | 4.58        |
| GCGTGGTGTG | 4.01        |
| GCGTGGGGGA | 2.14        |
| GCGTGGTGCG | 1.78        |
| GCGTGGCCGT | 1.19        |
| GCGTGGGGTA | 1.17        |
| GCGTGGGTGC | 1.15        |
| GCGTGGGGGT | 1.00        |
| GCGTGGTGAG | 0.39        |
| GCGTGGGATC | 0.04        |

**Supplementary Figure S1: De novo motif finding.** An overview of the bioinformatics processing showing reads that have been sorted, filtered (clean data), and split into 5 random, non-overlapping subsets of 10,000 reads for motif finding with MEME. The best 5 motifs from each run of MEME are scored against protein-containing and no-protein reads to find motifs with the greatest fold-enrichment. Motifs with 4-fold or greater enrichment are kept as the intermediate motifs. Reads matching the intermediate motifs are run through MEME again to produce the final motif(s).

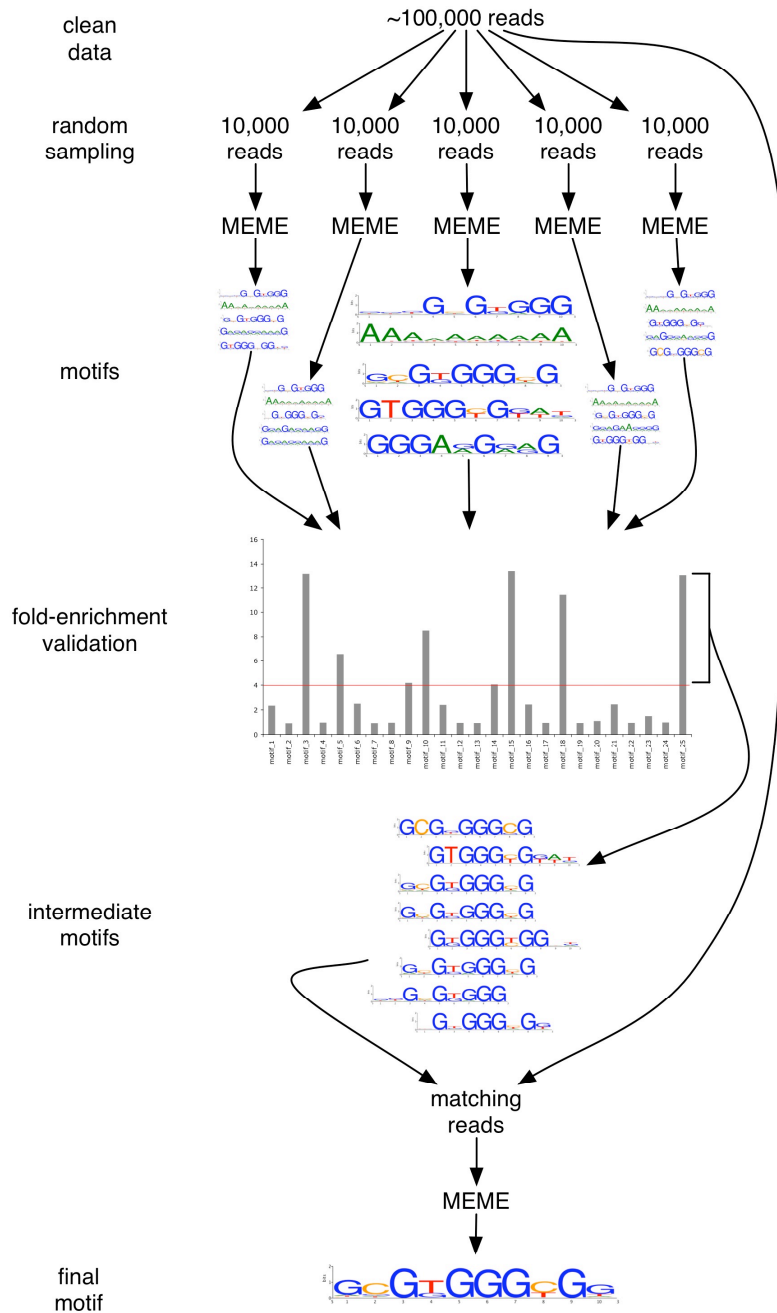

**Supplementary Figure S2: Sorting sequences by bar codes.**

|                              | run 1   | run 2   |
|------------------------------|---------|---------|
| Number of reads (raw data)   | 7275683 | 9390930 |
| Number of reads (clean data) | 3327661 | 5086559 |

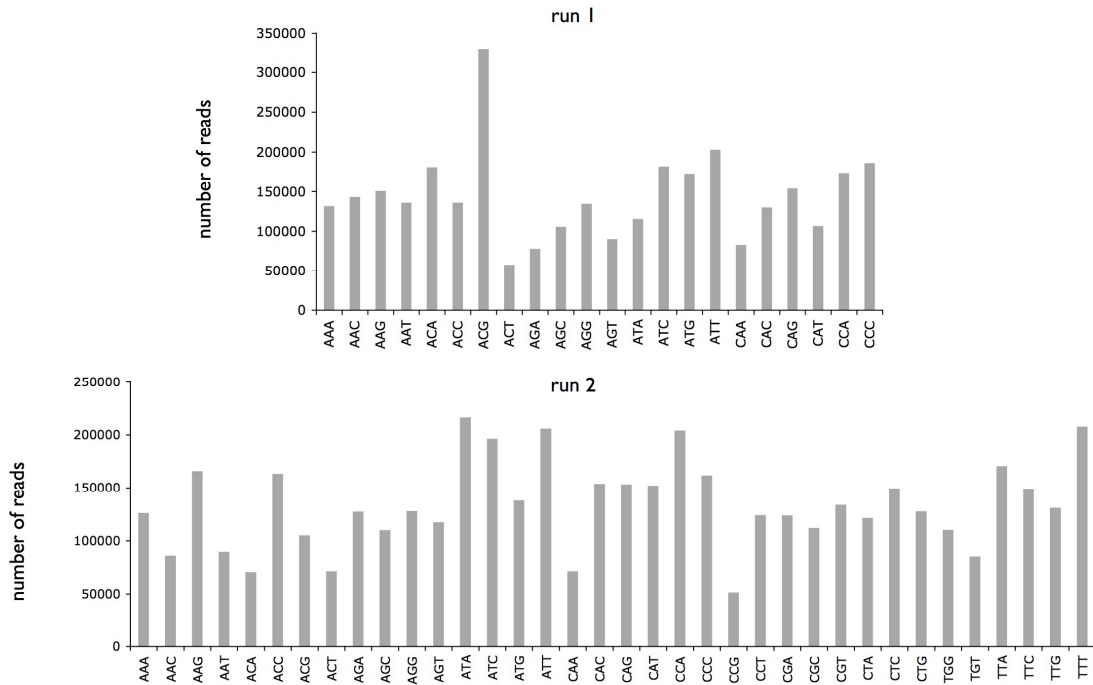

**Supplementary Figure S3: Percentage of the expected motif found in "clean" data.**

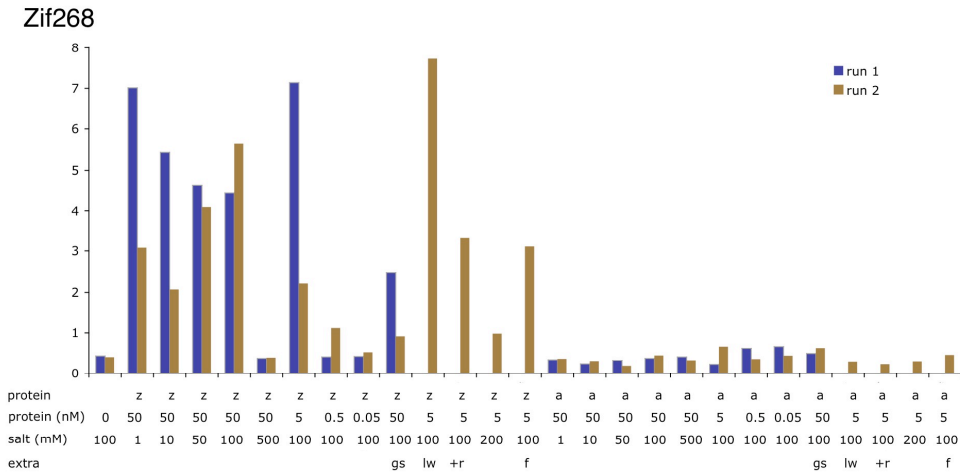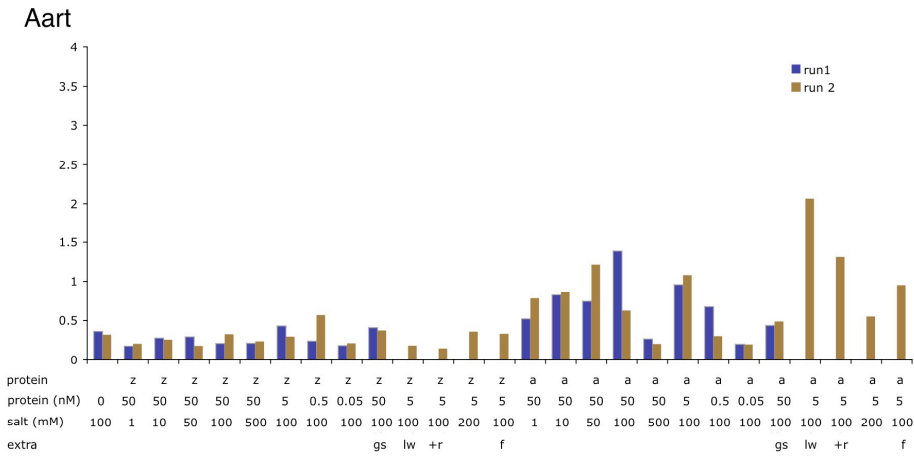

**Supplementary Figure S4:** The five best motifs. For Zif268 and Aart, each group of motifs was found from 10,000 reads.

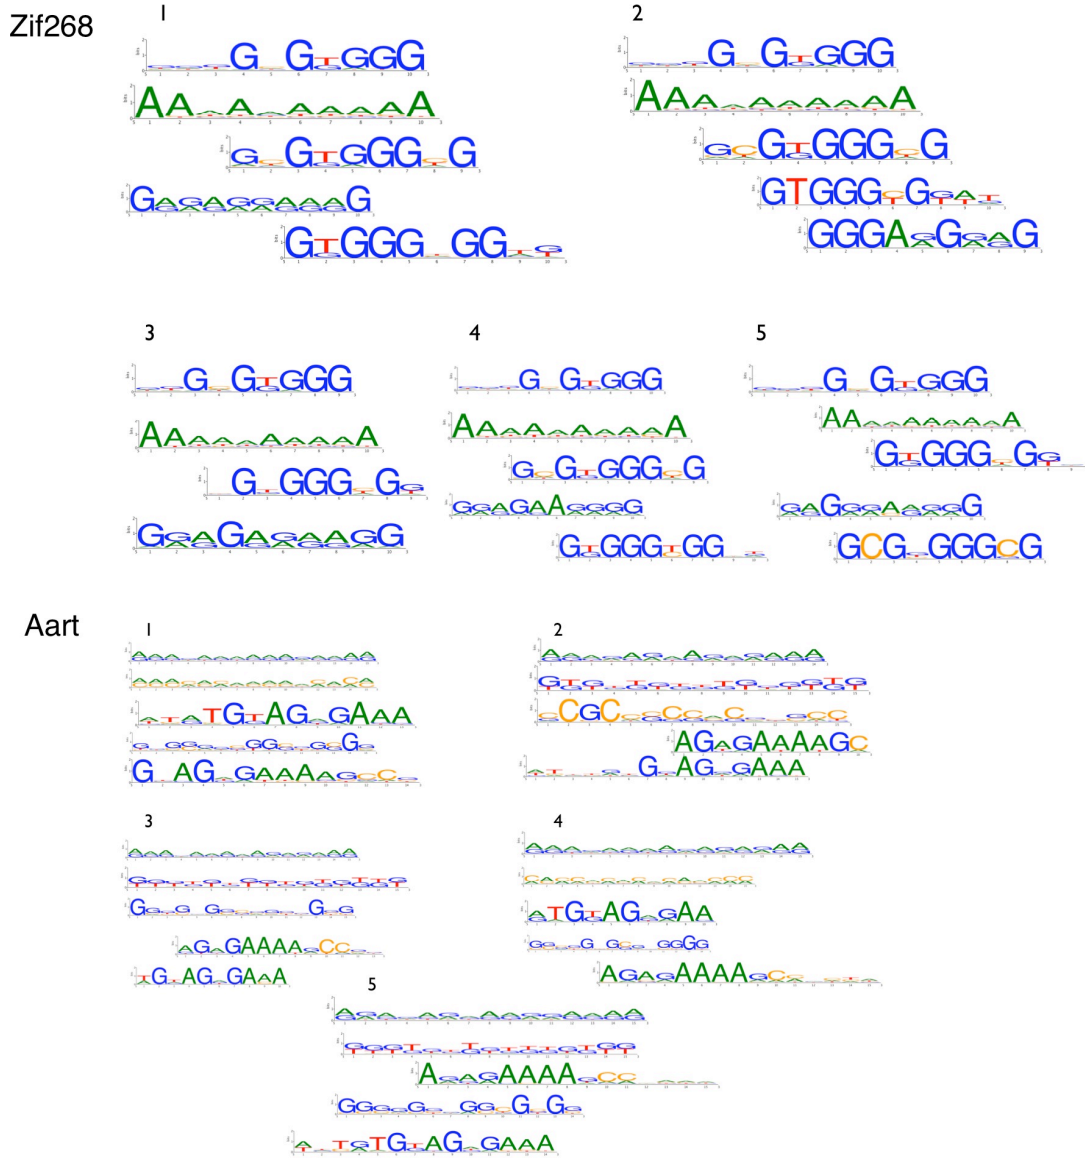



**Supplementary Figure S5:** Fold-enrichment of 25 motifs. Motifs on the x-axis correspond to motifs shown in Supplementary Figure S5.

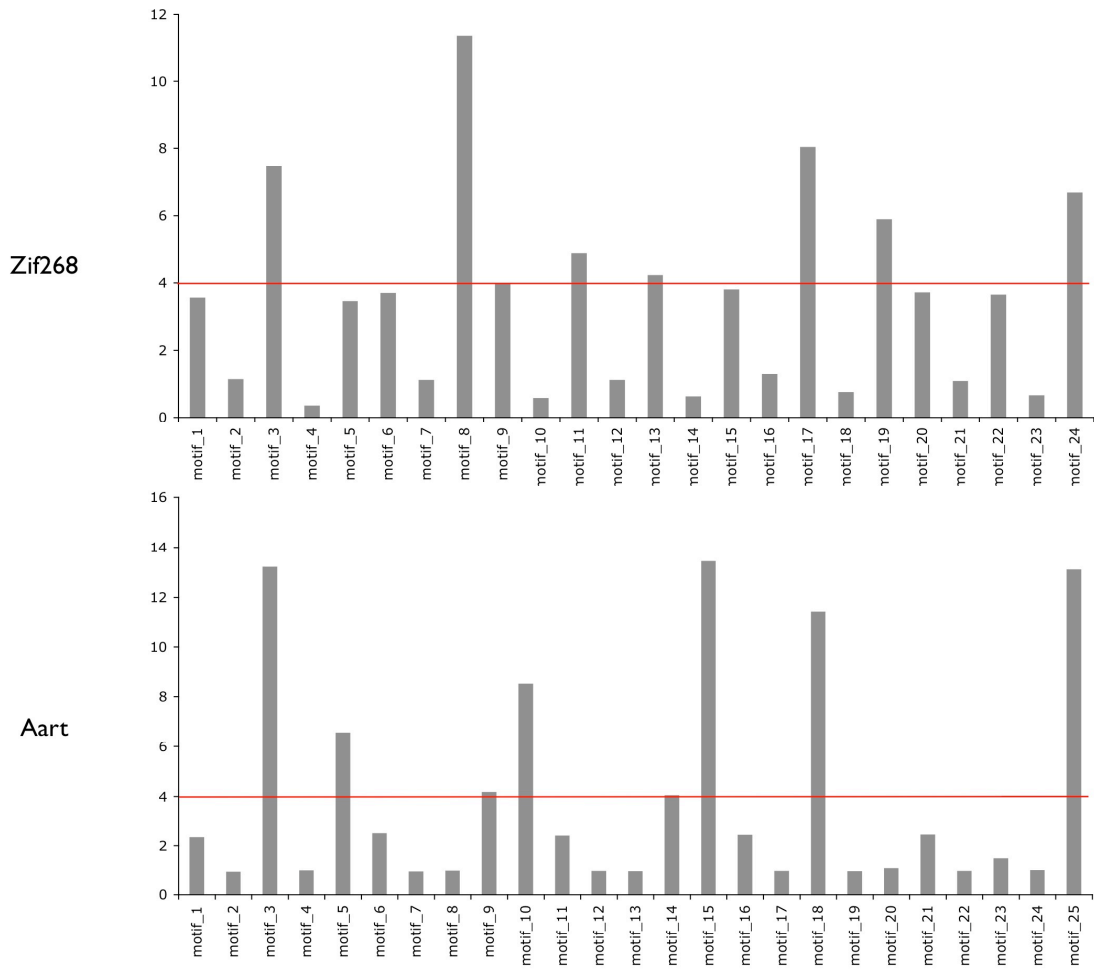

**Supplementary Figure S6:** Fold-enrichment of 15 ten-mers for Zif268.

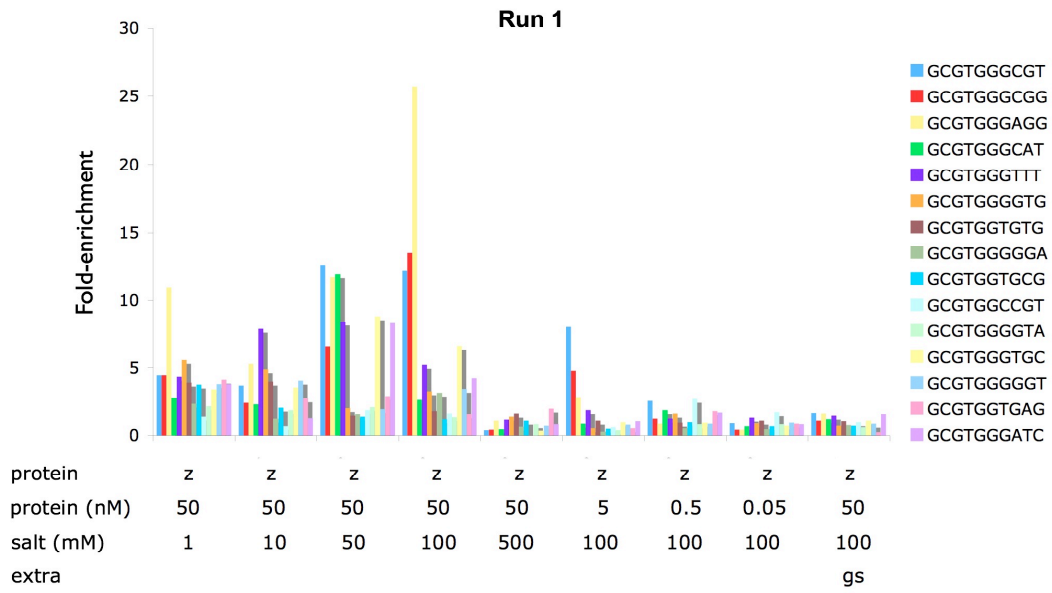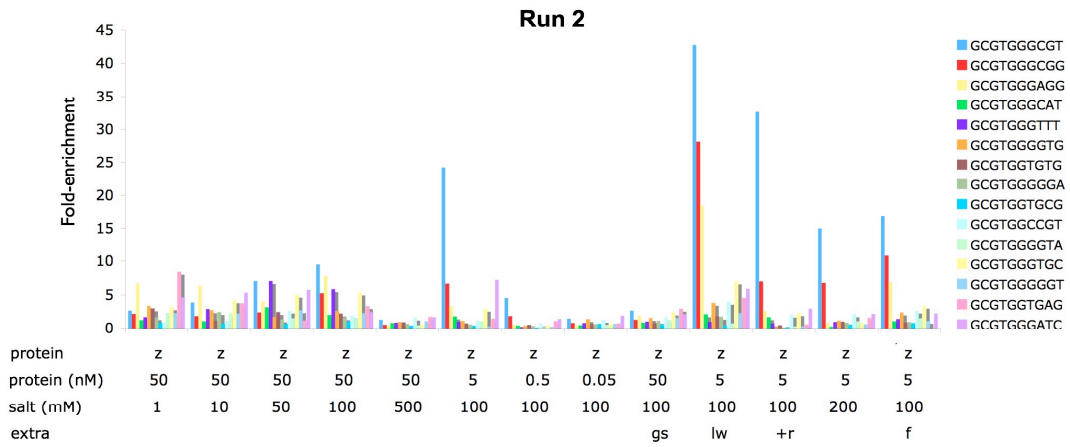

**Supplementary Figure S7:** MEME results with large windows and multiple motifs. Reads matching the intermediate motifs were used as input to MEME. A) Search performed with Zif268 reads and length = 12. B) Search performed with Aart reads and length = 15.

**A**

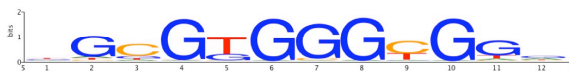

**B**

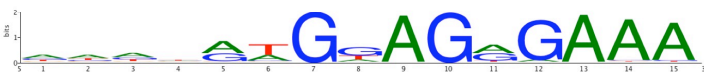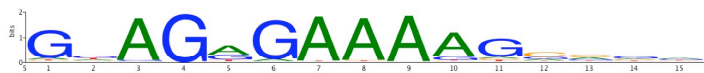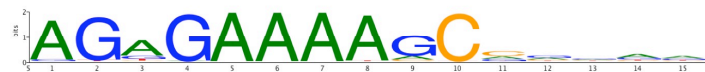

**Supplementary Figure S8: Nucleotide composition of the random region.**

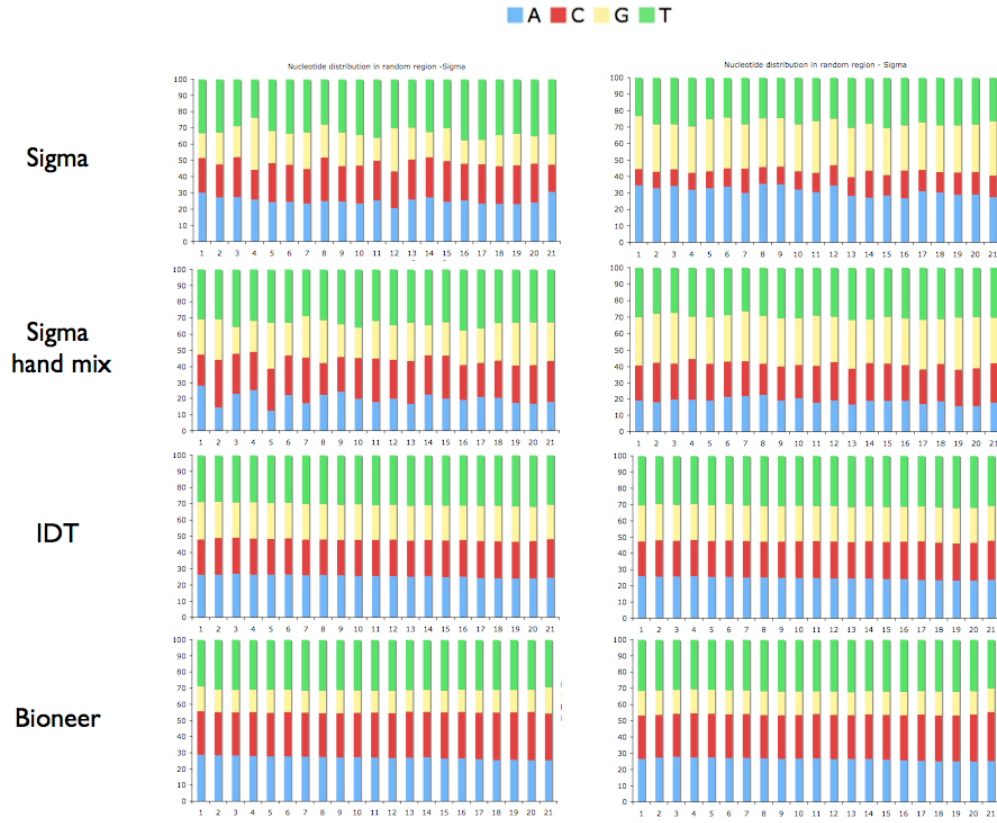

**Supplementary Figure S9:** Observed and expected dinucleotide compositions of the random regions. Expected compositions (nucXnuc) follow observed dinucleotide composition (dinuc) in each pair of columns.

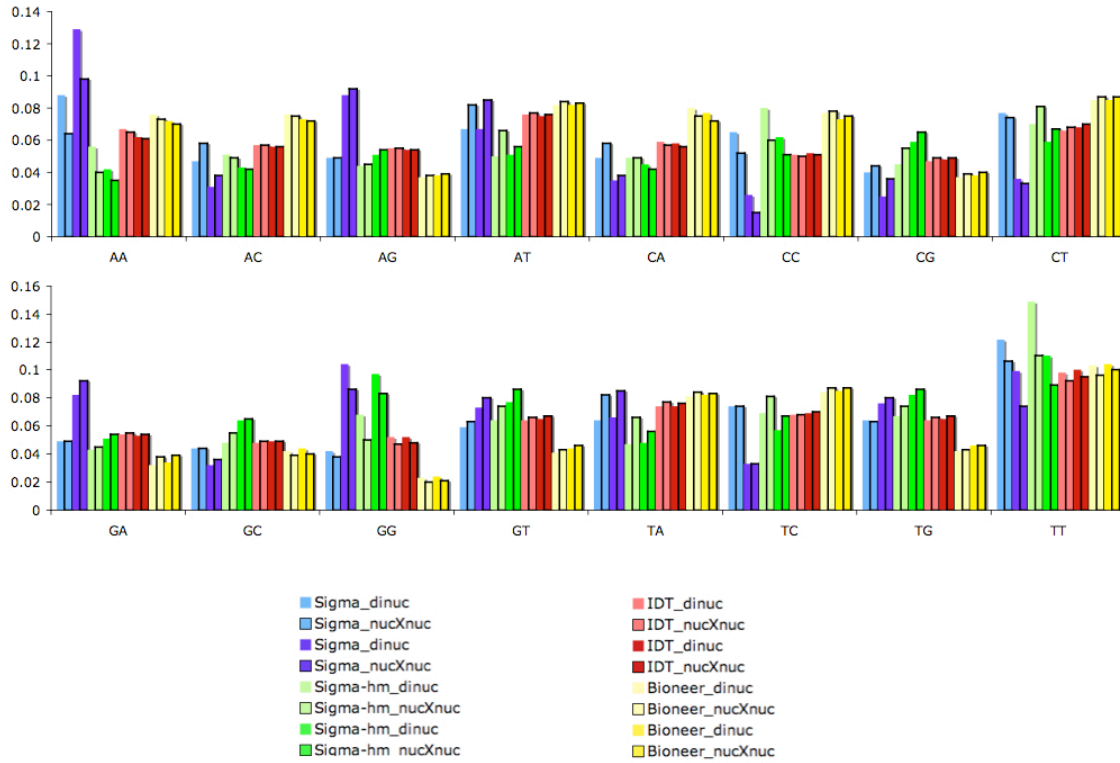

**Supplementary Figure S10:** Complexity (entropy) of the random region. Complexity is calculated as the Shannon information of the nucleotide frequencies. Examples of sequences and their complexities are shown below.

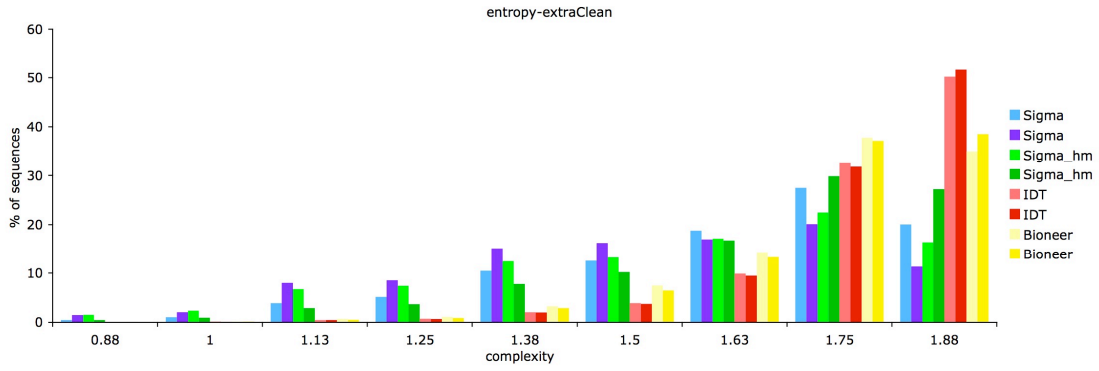

|                       | complexity scale |
|-----------------------|------------------|
| AAAAAAAAAAAAAAAAAAAA  | 0                |
| AAAAAAAAACAAAAACAAA   | 0.5              |
| TAAGAAAAAAAAATAAAAAA  | 0.8              |
| AATAAAAAAAAAATTAAATAC | 1                |
| ATAACAATAATATAAGAAA   | 1.3              |
| AAGGAAAGGAGGACGAATA   | 1.5              |
| ACCACAAAATCGAGTAACCA  | 1.7              |
| GATGACGAATACGTCGTTCTT | 2                |
